# Supplementary material for: Influence of COVID-19 Lockdown on Aerosol Optical Depth over Pokhara and Kyanjin Gompa in Nepal
Source: Research Square preprint supplement (doi:10.21203/rs.3.rs-669527/v1), 2021-06-30
Supplement: Supplementary file 1 [file 23ddf679329d977a7f17b668.docx]

(1)

α = - (2)

(3)
